# Supplementary material for: A deep learning framework for automated detection and quantitative assessment of liver trauma
Source: Springer Nature journal article supplement (doi:10.1186/s12880-022-00759-9), 2022-03-08
Supplement: 12880_2022_759_MOESM1_ESM.pdf [file 12880_2022_759_MOESM1_ESM.pdf]

# Supplementary Information: A Deep Learning Framework for Automated Detection and Quantitative Assessment of Liver Trauma

## Supplementary Method

U-net Architecture used to generate liver parenchyma and trauma segmentation masks.

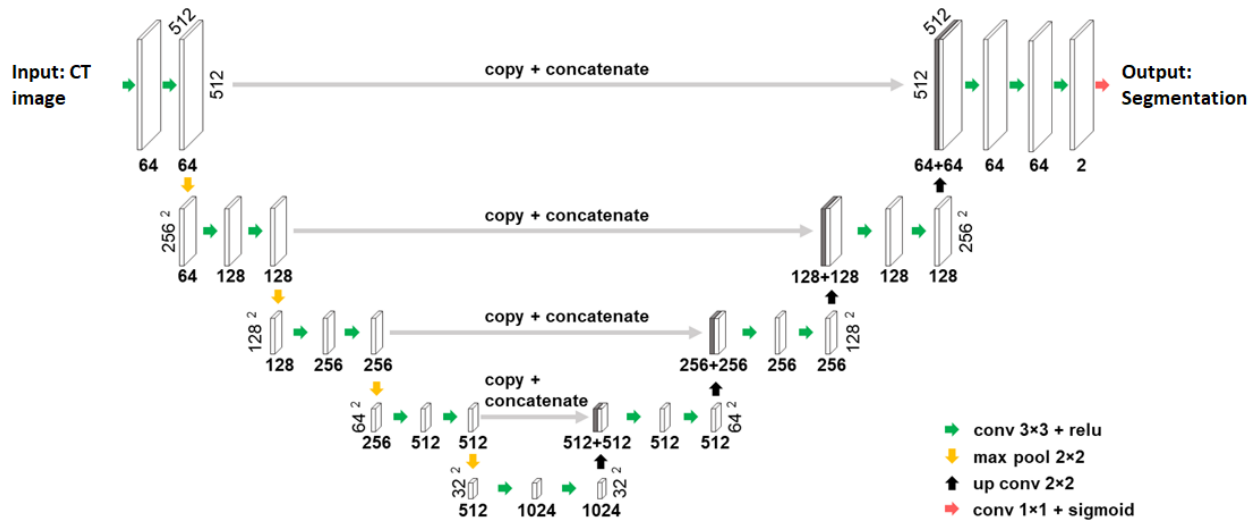

**Supplementary Figure 1.** Illustration of the baseline U-net architecture used for segmentation. This figure is borrowed from [41].

**Liver segmentation U-net specifications.** The U-net model for liver segmentation is trained for 3000 epochs, and each epoch is learned on 10 patients. An Adam optimizer with a learning rate of  $2 \times 10^{-4}$  is used to minimize the binary cross-entropy loss.

**Liver disruption segmentation U-net specifications.** The U-net model for liver disruption segmentation is trained for 4000 epochs, and each epoch is learned on 10 patients. An Adam optimizer with a learning rate of  $5 \times 10^{-5}$  is used to minimize the binary cross-entropy loss.
